# Supplementary material for: Adherence to a Plant-Based Diet and Consumption of Specific Plant Foods—Associations with 3-Year Weight-Loss Maintenance and Cardiometabolic Risk Factors: A Secondary Analysis of the PREVIEW Intervention Study
Source: MDPI journal article supplement (doi:10.3390/nu13113916), 2021-11-01
Supplement: s1 [file s1]

# Supplementary Materials

Adherence to A Plant-based Diet and Consumption of Specific Plant Foods - Associations with 3-year Weight-loss Maintenance and Cardiometabolic Risk Factors: A Secondary Analysis of the PREVIEW Intervention Study

## Statistical Analysis

Dietary diaries were not provided by participants at 8 weeks (the end of the weight loss phase) for 2 reasons. First, dietary instruction in each arm had not started at that time. Second, as participants were still being given food choice guidance e.g. daily eating plans and cooking books [1] at the start of the weight-loss maintenance phase (from 8 to 16 weeks), we hypothesized that dietary intake did not change that much during this period. By 26 weeks, we assumed their diets would be close to the target of each arm. Therefore, in the present study, 26-week diet and physical activity was used to estimate the average dietary intake and physical activity from 8 to 26 weeks.

## References

1. Fogelholm, M.; Larsen, T.M.; Westerterp-Plantenga, M.; Macdonald, I.; Martinez, J.A.; Boyadjieva, N.; Poppitt, S.; Schlicht, W.; Stratton, G.; Sundvall, J., et al. PREVIEW: prevention of diabetes through lifestyle intervention and population studies in Europe and around the world. design, methods, and baseline participant description of an adult cohort enrolled into a three-year randomised clinical trial. *Nutrients* **2017**, *9*, 632, doi:10.3390/nu9060632.

## Supplementary Materials

Adherence to A Plant-based Diet and Consumption of Specific Plant Foods - Associations with 3-year Weight-loss Maintenance and Cardiometabolic Risk Factors: A Secondary Analysis of the PREVIEW Intervention Study

**Table S1.** Calculations for cumulative average dietary intake, physical activity, and yearly changes in body weight and cardiometabolic risk factors

| Intervals   | Cumulative average dietary intake and physical activity                                 | Yearly changes in body weight and cardiometabolic risk factors |
|-------------|-----------------------------------------------------------------------------------------|----------------------------------------------------------------|
| 8–26 weeks  | Values at 26 weeks                                                                      | Values at 26 weeks - values at 8 weeks                         |
| 8–52 weeks  | (Values at 26 weeks + values at 52 weeks)/2                                             | Values at 52 weeks - values at 8 weeks                         |
| 8–104 weeks | (Values at 26 weeks + values at 52 weeks + values at 104 weeks)/3                       | Values at 104 weeks - values at 8 weeks                        |
| 8–156 weeks | (Values at 26 weeks + values at 52 weeks + values at 104 weeks + values at 156 weeks)/4 | Values at 156 weeks - values at 8 weeks                        |

## Supplementary Materials

Adherence to A Plant-based Diet and Consumption of Specific Plant Foods - Associations with 3-year Weight-loss Maintenance and Cardiometabolic Risk Factors: A Secondary Analysis of the PREVIEW Intervention Study

**Table S2.** Longitudinal associations of adherence to healthy plant-based diet with yearly changes in weight outcomes and cardiometabolic risk factors during weight-loss maintenance ( $n=688$ )

| Characteristic                                                      | Model 1 <sup>1</sup>                    |         | Model 2 <sup>2</sup>       |         | Model 3 <sup>3</sup>       |         |
|---------------------------------------------------------------------|-----------------------------------------|---------|----------------------------|---------|----------------------------|---------|
|                                                                     | Yearly mean change (95%CI) <sup>4</sup> | P-value | Yearly mean change (95%CI) | P-value | Yearly mean change (95%CI) | P-value |
| ΔFat mass (kg·year <sup>-1</sup> )                                  | -0.17 (-0.38, 0.04)                     | 0.106   | -0.22 (-0.51, 0.07)        | 0.134   | -                          | -       |
| ΔWaist circumference (cm·year <sup>-1</sup> )                       | -0.13 (-0.35, 0.08)                     | 0.231   | -0.14 (-0.44, 0.16)        | 0.350   | -                          | -       |
| ΔFasting plasma glucose (mmol·L <sup>-1</sup> ·year <sup>-1</sup> ) | -0.009 (-0.03, 0.01)                    | 0.369   | -0.03 (-0.06, 0.007)       | 0.123   | -0.02 (-0.05, 0.01)        | 0.206   |
| ΔHbA <sub>1c</sub> (mmol·mol <sup>-1</sup> ·year <sup>-1</sup> )    | -0.05 (-0.13, 0.03)                     | 0.257   | -0.10 (-0.22, 0.01)        | 0.081   | -0.07 (-0.18, 0.03)        | 0.179   |
| ΔFasting insulin (mU·L <sup>-1</sup> ·year <sup>-1</sup> )          | -0.0008 (-0.16, 0.16)                   | 0.992   | 0.02 (-0.20, 0.24)         | 0.848   | 0.09 (-0.12, 0.31)         | 0.393   |
| ΔHOMA-IR (year <sup>-1</sup> )                                      | -0.007 (-0.006, 0.04)                   | 0.774   | -0.004 (-0.07, 0.06)       | 0.903   | 0.02 (-0.05, 0.08)         | 0.586   |
| ΔSystolic blood pressure (mmHg·year <sup>-1</sup> )                 | -0.01 (-0.49, 0.47)                     | 0.980   | 0.24 (-0.49, 0.97)         | 0.520   | 0.38 (-0.34, 1.09)         | 0.299   |
| ΔDiastolic blood pressure (mmHg·year <sup>-1</sup> )                | 0.26 (-0.04, 0.55)                      | 0.086   | 0.37 (-0.07, 0.82)         | 0.097   | 0.44 (0.0005, 0.87)        | 0.050   |
| ΔTriacylglycerol (mmol·L <sup>-1</sup> ·year <sup>-1</sup> )        | -0.01 (-0.02, 0.01)                     | 0.476   | -0.009 (-0.03, 0.02)       | 0.494   | -0.002 (-0.03, 0.02)       | 0.845   |
| ΔTotal cholesterol (mmol·L <sup>-1</sup> ·year <sup>-1</sup> )      | -0.02 (-0.05, 0.01)                     | 0.143   | -0.03 (-0.07, 0.007)       | 0.109   | -0.03 (-0.06, 0.01)        | 0.152   |
| ΔHDL-cholesterol (mmol·L <sup>-1</sup> ·year <sup>-1</sup> )        | 0.003 (-0.003, 0.01)                    | 0.311   | 0.009 (-0.0007, 0.02)      | 0.068   | 0.008 (-0.002, 0.02)       | 0.106   |

Analyses were performed using a linear mixed model with repeated measures. <sup>1</sup>Model 1 was adjusted for fixed factors including age, sex, ethnicity, BMI at 8 weeks, weight outcomes or cardiometabolic risk factors at 8 weeks, and time and random factors including study center and participant-ID. <sup>2</sup>Model 2 was adjusted for confounders in model 1 plus fixed factors including time-varying physical activity, energy intake (kcal·day<sup>-1</sup>), and alcohol intake (g·day<sup>-1</sup>); for systolic blood pressure and diastolic blood pressure, model 2 was additionally adjusted for dietary sodium intake (g·day<sup>-1</sup>). <sup>3</sup>Model 3 was adjusted for confounders in model 2 plus time-varying yearly weight change as a fixed factor. <sup>4</sup>Yearly mean change and 95% CI of main effects indicating changes in weight outcomes or cardiometabolic risk factors per year associated with 1-standard deviation increment in healthy plant-based diet index. HbA<sub>1c</sub>, glycosylated hemoglobin A<sub>1c</sub>; HDL-cholesterol, high-density lipoprotein cholesterol; HOMA-IR, homeostatic model assessment of insulin resistance.

## Supplementary Materials

Adherence to A Plant-based Diet and Consumption of Specific Plant Foods - Associations with 3-year Weight-loss Maintenance and Cardiometabolic Risk Factors: A Secondary Analysis of the PREVIEW Intervention Study

**Table S3.** Longitudinal associations of total grain and potato intake with yearly weight regain and changes in cardiometabolic risk factors during weight-loss maintenance ( $n=710$ )

| Characteristic                                                      | Model 1 <sup>1</sup>                    |         | Model 2 <sup>2</sup>       |         | Model 3 <sup>3</sup>       |         |
|---------------------------------------------------------------------|-----------------------------------------|---------|----------------------------|---------|----------------------------|---------|
|                                                                     | Yearly mean change (95%CI) <sup>4</sup> | P-value | Yearly mean change (95%CI) | P-value | Yearly mean change (95%CI) | P-value |
| ΔBody weight (kg·year <sup>-1</sup> )                               | 0.05 (-0.04, 0.14)                      | 0.246   | 0.13 (-0.02, 0.29)         | 0.084   | -                          | -       |
| ΔFat mass (kg·year <sup>-1</sup> )                                  | 0.01 (-0.09, 0.11)                      | 0.842   | 0.04 (-0.13, 0.21)         | 0.626   | -                          | -       |
| ΔWaist circumference (cm·year <sup>-1</sup> )                       | 0.02 (-0.08, 0.12)                      | 0.706   | 0.13 (-0.06, 0.32)         | 0.174   | -                          | -       |
| ΔFasting plasma glucose (mmol·L <sup>-1</sup> ·year <sup>-1</sup> ) | -0.0009 (-0.01, 0.01)                   | 0.871   | -0.003 (-0.03, 0.02)       | 0.768   | -0.000003 (-0.02, 0.02)    | 0.996   |
| ΔHbA <sub>1c</sub> (mmol·mol <sup>-1</sup> ·year <sup>-1</sup> )    | 0.01 (-0.03, 0.05)                      | 0.512   | 0.02 (-0.05, 0.10)         | 0.521   | 0.02 (-0.05, 0.08)         | 0.657   |
| ΔFasting insulin (mU·L <sup>-1</sup> ·year <sup>-1</sup> )          | 0.03 (-0.04, 0.11)                      | 0.408   | 0.06 (-0.09, 0.20)         | 0.439   | 0.06 (-0.08, 0.19)         | 0.413   |
| ΔHOMA-IR (year <sup>-1</sup> )                                      | 0.01 (-0.01, 0.04)                      | 0.341   | 0.001 (-0.05, 0.05)        | 0.951   | 0.01 (-0.03, 0.06)         | 0.575   |
| ΔSystolic blood pressure (mmHg·year <sup>-1</sup> )                 | 0.29 (0.06, 0.52)                       | 0.012   | 0.05 (-0.44, 0.54)         | 0.842   | -0.02 (-0.93, 0.89)        | 0.966   |
| ΔDiastolic blood pressure (mmHg·year <sup>-1</sup> )                | 0.09 (-0.04, 0.23)                      | 0.189   | -0.07 (-0.35, 0.22)        | 0.646   | -0.08 (-0.36, 0.19)        | 0.552   |
| ΔTriacylglycerol (mmol·L <sup>-1</sup> ·year <sup>-1</sup> )        | 0.007 (-0.003, 0.02)                    | 0.156   | 0.01 (-0.009, 0.03)        | 0.293   | 0.008 (-0.009, 0.03)       | 0.349   |
| ΔTotal cholesterol (mmol·L <sup>-1</sup> ·year <sup>-1</sup> )      | 0.00000005 (-0.06, 0.06)                | 1.000   | -0.02 (-0.04, 0.005)       | 0.129   | -0.02 (-0.04, 0.004)       | 0.111   |
| ΔHDL-cholesterol (mmol·L <sup>-1</sup> ·year <sup>-1</sup> )        | 0.003 (-0.00004, 0.01)                  | 0.053   | -0.004 (-0.01, 0.002)      | 0.222   | -0.003 (-0.009, 0.003)     | 0.308   |
| ΔLDL-cholesterol (mmol·L <sup>-1</sup> ·year <sup>-1</sup> )        | -0.003 (-0.01, 0.007)                   | 0.562   | -0.02 (-0.04, 0.001)       | 0.069   | -0.02 (-0.04, 0.001)       | 0.064   |

Analyses were performed using a linear mixed model with repeated measures. <sup>1</sup>Model 1 was adjusted for fixed factors including age, sex, ethnicity, BMI at 8 weeks, body weight or cardiometabolic risk factors at 8 weeks, and time and random factors including study center and participant-ID. <sup>2</sup>Model 2 was adjusted for confounders in model 1 plus fixed factors including time-varying physical activity, energy intake (kJ·day<sup>-1</sup>), alcohol intake (g·day<sup>-1</sup>), animal-based food intake (g·day<sup>-1</sup>), and other plant food intake (g·day<sup>-1</sup>); for systolic blood pressure and diastolic blood pressure, model 2 was additionally adjusted for dietary sodium intake (g·day<sup>-1</sup>). <sup>3</sup>Model 3 was adjusted confounders in model 2 plus time-varying yearly changes in body weight as a fixed factor. <sup>4</sup>Yearly mean change and 95% CI of main effects indicating changes in body weight or cardiometabolic risk factors per year associated with 75-g increment in total grains. HbA<sub>1c</sub>, glycosylated hemoglobin A<sub>1c</sub>; HDL-cholesterol, high-density lipoprotein cholesterol; HOMA-IR, homeostatic model assessment of insulin resistance; LDL-cholesterol, low-density lipoprotein cholesterol.

## Supplementary Materials

Adherence to A Plant-based Diet and Consumption of Specific Plant Foods - Associations with 3-year Weight-loss Maintenance and Cardiometabolic Risk Factors: A Secondary Analysis of the PREVIEW Intervention Study

**Table S4.** Longitudinal associations of legume intake with yearly weight regain and changes in cardiometabolic risk factors during weight-loss maintenance ( $n=710$ )

| Characteristic                                                      | Model 1 <sup>1</sup>                    |         | Model 2 <sup>2</sup>       |         | Model 3 <sup>3</sup>       |         |
|---------------------------------------------------------------------|-----------------------------------------|---------|----------------------------|---------|----------------------------|---------|
|                                                                     | Yearly mean change (95%CI) <sup>4</sup> | P-value | Yearly mean change (95%CI) | P-value | Yearly mean change (95%CI) | P-value |
| ΔBody weight (kg·year <sup>-1</sup> )                               | -0.01 (-0.04, 0.01)                     | 0.318   | -0.006 (-0.03, 0.02)       | 0.678   | -                          | -       |
| ΔFat mass (kg·year <sup>-1</sup> )                                  | -0.03 (-0.06, -0.002)                   | 0.034   | -0.02 (-0.05, 0.01)        | 0.263   | -                          | -       |
| ΔWaist circumference (cm·year <sup>-1</sup> )                       | -0.03 (-0.06, -0.002)                   | 0.037   | -0.02 (-0.05, 0.02)        | 0.381   | -                          | -       |
| ΔFasting plasma glucose (mmol·L <sup>-1</sup> ·year <sup>-1</sup> ) | -0.0002 (-0.003, 0.003)                 | 0.920   | 0.0007 (-0.004, 0.005)     | 0.732   | 0.002 (-0.002, 0.006)      | 0.311   |
| ΔHbA <sub>1c</sub> (mmol·mol <sup>-1</sup> ·year <sup>-1</sup> )    | -0.004 (-0.01, 0.007)                   | 0.447   | -0.004 (-0.02, 0.009)      | 0.528   | -0.001 (-0.014, 0.01)      | 0.844   |
| ΔFasting insulin (mU·L <sup>-1</sup> ·year <sup>-1</sup> )          | -0.01 (-0.03, 0.01)                     | 0.276   | -0.02 (-0.04, 0.01)        | 0.224   | -0.008 (-0.03, 0.02)       | 0.556   |
| ΔHOMA-IR (year <sup>-1</sup> )                                      | -0.004 (-0.01, 0.004)                   | 0.322   | -0.005 (-0.01, 0.004)      | 0.284   | -0.0008 (-0.009, 0.007)    | 0.844   |
| ΔSystolic blood pressure (mmHg·year <sup>-1</sup> )                 | 0.0008 (-0.07, 0.07)                    | 0.983   | 0.07 (-0.01, 0.16)         | 0.102   | 0.08 (-0.09, 0.25)         | 0.372   |
| ΔDiastolic blood pressure (mmHg·year <sup>-1</sup> )                | 0.02 (-0.02, 0.06)                      | 0.401   | 0.03 (-0.02, 0.09)         | 0.178   | 0.04 (-0.007, 0.09)        | 0.096   |
| ΔTriacylglycerol (mmol·L <sup>-1</sup> ·year <sup>-1</sup> )        | -0.002 (-0.004, 0.0007)                 | 0.157   | -0.002 (-0.005, 0.001)     | 0.225   | -0.001 (-0.004, 0.002)     | 0.402   |
| ΔTotal cholesterol (mmol·L <sup>-1</sup> ·year <sup>-1</sup> )      | -0.0001 (-0.004, 0.003)                 | 0.953   | -0.0002 (-0.005, 0.004)    | 0.923   | 0.0002 (-0.004, 0.004)     | 0.942   |
| ΔLDL-cholesterol (mmol·L <sup>-1</sup> ·year <sup>-1</sup> )        | -0.0003 (-0.003, 0.003)                 | 0.854   | -0.001 (-0.004, 0.003)     | 0.779   | -0.0004 (-0.004, 0.003)    | 0.845   |

Analyses were performed using a linear mixed model with repeated measures. <sup>1</sup>Model 1 was adjusted for fixed factors including age, sex, ethnicity, BMI at 8 weeks, weight or cardiometabolic risk factors at 8 weeks, and time and random factors including study center and participant-ID. <sup>2</sup>Model 2 was adjusted for confounders in model 1 plus fixed factors including time-varying physical activity, energy intake (kJ·day<sup>-1</sup>), alcohol intake (g·day<sup>-1</sup>), animal-based food intake (g·day<sup>-1</sup>), and other plant food intake (g·day<sup>-1</sup>); for systolic blood pressure and diastolic blood pressure, model 2 was additionally adjusted for dietary sodium intake (g·day<sup>-1</sup>). <sup>3</sup>Model 3 was adjusted confounders in model 2 plus time-varying yearly changes in body weight as a fixed factor. <sup>4</sup>Yearly mean change and 95% CI of main effects indicating changes in body weight or cardiometabolic risk factors per year associated with 10-g increment in legumes. HbA<sub>1c</sub>, glycosylated hemoglobin A<sub>1c</sub>; HOMA-IR, homeostatic model assessment of insulin resistance; LDL-cholesterol, low-density lipoprotein cholesterol.

## Supplementary Materials

Adherence to A Plant-based Diet and Consumption of Specific Plant Foods - Associations with 3-year Weight-loss Maintenance and Cardiometabolic Risk Factors: A Secondary Analysis of the PREVIEW Intervention Study

**Table S5.** Longitudinal associations of nut intake with yearly changes in waist circumference and cardiometabolic risk factors during weight-loss maintenance ( $n=710$ )

| Characteristic                                                      | Model 1 <sup>1</sup>                    |                 | Model 2 <sup>2</sup>       |                 | Model 3 <sup>3</sup>       |                 |
|---------------------------------------------------------------------|-----------------------------------------|-----------------|----------------------------|-----------------|----------------------------|-----------------|
|                                                                     | Yearly mean change (95%CI) <sup>4</sup> | <i>P</i> -value | Yearly mean change (95%CI) | <i>P</i> -value | Yearly mean change (95%CI) | <i>P</i> -value |
| ΔWaist circumference (cm·year <sup>-1</sup> )                       | -0.01 (-0.07, 0.04)                     | 0.662           | 0.13 (-0.06, 0.32)         | 0.174           | -                          | -               |
| ΔFasting plasma glucose (mmol·L <sup>-1</sup> ·year <sup>-1</sup> ) | 0.0007 (-0.005, 0.007)                  | 0.871           | -0.005 (-0.01, 0.004)      | 0.309           | -0.002 (-0.01, 0.006)      | 0.599           |
| ΔFasting insulin (mU·L <sup>-1</sup> ·year <sup>-1</sup> )          | 0.02 (-0.02, 0.06)                      | 0.271           | -0.006 (-0.06, 0.05)       | 0.843           | 0.02 (-0.03, 0.07)         | 0.490           |
| ΔHOMA-IR (year <sup>-1</sup> )                                      | 0.004 (-0.005, 0.02)                    | 0.552           | -0.002 (-0.02, 0.02)       | 0.837           | 0.006 (-0.01, 0.02)        | 0.497           |
| ΔSystolic blood pressure (mmHg·year <sup>-1</sup> )                 | -0.07 (-0.20, 0.06)                     | 0.288           | -0.14 (-0.34, 0.03)        | 0.099           | -0.20 (-0.58, 0.18)        | 0.304           |
| ΔDiastolic blood pressure (mmHg·year <sup>-1</sup> )                | -0.05 (-0.12, 0.03)                     | 0.220           | -0.10 (-0.20, 0.009)       | 0.072           | -0.08 (-0.18, 0.03)        | 0.141           |
| ΔTriacylglycerol (mmol·L <sup>-1</sup> ·year <sup>-1</sup> )        | 0.002 (-0.003, 0.007)                   | 0.457           | -0.01 (-0.01, 0.0005)      | 0.071           | -0.004 (-0.01, 0.002)      | 0.231           |
| ΔHDL-cholesterol (mmol·L <sup>-1</sup> ·year <sup>-1</sup> )        | -0.001 (-0.003, 0.0006)                 | 0.229           | -0.0009 (-0.003, 0.001)    | 0.409           | -0.001 (-0.003, 0.0007)    | 0.202           |

Analyses were performed using a linear mixed model with repeated measures. <sup>1</sup>Model 1 was adjusted for fixed factors including age, sex, ethnicity, BMI at 8 weeks, waist circumference or cardiometabolic risk factors at 8 weeks, and time and random factors including study center and participant-ID. <sup>2</sup>Model 2 was adjusted for confounders in model 1 plus fixed factors including time-varying physical activity, energy intake (kJ·day<sup>-1</sup>), alcohol intake (g·day<sup>-1</sup>), animal-based food intake (g·day<sup>-1</sup>), and other plant food intake (g·day<sup>-1</sup>); for systolic blood pressure and diastolic blood pressure, model 2 was additionally adjusted for dietary sodium intake (g·day<sup>-1</sup>). <sup>3</sup>Model 3 was adjusted for confounders in model 2 plus time-varying yearly changes in body weight as a fixed factor <sup>4</sup>Yearly mean change and 95% CI of main effects indicating changes in waist circumference or cardiometabolic risk factors per year associated with 5-g increment in nuts. HDL-cholesterol, high-density lipoprotein cholesterol; HOMA-IR, homeostatic model assessment of insulin resistance.

## Supplementary Materials

Adherence to A Plant-based Diet and Consumption of Specific Plant Foods - Associations with 3-year Weight-loss Maintenance and Cardiometabolic Risk Factors: A Secondary Analysis of the PREVIEW Intervention Study

**Table S6.** Longitudinal associations of fruit intake with yearly weight regain and changes in cardiometabolic risk factors during weight-loss maintenance ( $n=710$ )

| Characteristic                                                              | Model 1 <sup>1</sup>                    |         | Model 2 <sup>2</sup>       |         | Model 3 <sup>3</sup>       |         |
|-----------------------------------------------------------------------------|-----------------------------------------|---------|----------------------------|---------|----------------------------|---------|
|                                                                             | Yearly mean change (95%CI) <sup>4</sup> | P-value | Yearly mean change (95%CI) | P-value | Yearly mean change (95%CI) | P-value |
| $\Delta$ Body weight (kg·year <sup>-1</sup> )                               | -0.01 (-0.07, 0.05)                     | 0.744   | -0.02 (-0.10, 0.05)        | 0.559   | -                          | -       |
| $\Delta$ Fat mass (kg·year <sup>-1</sup> )                                  | 0.05 (-0.02, 0.12)                      | 0.151   | -0.008 (-0.09, 0.08)       | 0.857   | -                          | -       |
| $\Delta$ Waist circumference (cm·year <sup>-1</sup> )                       | -0.04 (-0.11, 0.03)                     | 0.283   | -0.03 (-0.12, 0.06)        | 0.550   | -                          | -       |
| $\Delta$ Fasting plasma glucose (mmol·L <sup>-1</sup> ·year <sup>-1</sup> ) | -0.005 (-0.01, 0.002)                   | 0.184   | -0.007 (-0.02, 0.004)      | 0.208   | -0.005 (-0.02, 0.006)      | 0.351   |
| $\Delta$ HbA <sub>1c</sub> (mmol·mol <sup>-1</sup> ·year <sup>-1</sup> )    | -0.01 (-0.04, 0.01)                     | 0.393   | -0.02 (-0.06, 0.02)        | 0.260   | -0.01 (-0.05, 0.02)        | 0.454   |
| $\Delta$ Fasting insulin (mU·L <sup>-1</sup> ·year <sup>-1</sup> )          | -0.009 (-0.06, 0.04)                    | 0.725   | -0.02 (-0.09, 0.05)        | 0.526   | -0.006 (-0.07, 0.06)       | 0.854   |
| $\Delta$ HOMA-IR (year <sup>-1</sup> )                                      | -0.006 (-0.02, 0.01)                    | 0.491   | -0.01 (-0.04, 0.01)        | 0.246   | -0.006 (-0.03, 0.02)       | 0.569   |
| $\Delta$ Systolic blood pressure (mmHg·year <sup>-1</sup> )                 | 0.02 (-0.14, 0.17)                      | 0.818   | -0.14 (-0.37, 0.10)        | 0.257   | -0.12 (-0.57, 0.33)        | 0.608   |
| $\Delta$ Triacylglycerol (mmol·L <sup>-1</sup> ·year <sup>-1</sup> )        | -0.003 (-0.009, 0.003)                  | 0.402   | 0.004 (-0.005, 0.01)       | 0.348   | 0.005 (-0.003, 0.01)       | 0.200   |
| $\Delta$ HDL-cholesterol (mmol·L <sup>-1</sup> ·year <sup>-1</sup> )        | -0.0001 (-0.002, 0.002)                 | 0.906   | -0.001 (-0.004, 0.001)     | 0.336   | -0.002 (-0.004, 0.001)     | 0.230   |

Analyses were performed using a linear mixed model with repeated measures.<sup>1</sup>Model 1 was adjusted for fixed factors including age, sex, ethnicity, BMI at 8 weeks, body weight or cardiometabolic risk factors at 8 weeks, and time and random factors including study center and participant-ID. <sup>2</sup>Model 2 was adjusted for confounders in model 1 plus fixed factors including time-varying physical activity, energy intake (kJ·day<sup>-1</sup>), alcohol intake (g·day<sup>-1</sup>), animal-based food intake (g·day<sup>-1</sup>), and other plant food intake (g·day<sup>-1</sup>); for systolic blood pressure, model 2 was additionally adjusted for dietary sodium intake (g·day<sup>-1</sup>). <sup>3</sup>Model 3 was adjusted confounders in model 2 plus time-varying yearly changes in body weight as a fixed factor. <sup>4</sup>Yearly mean change and 95% CI of main effects indicating changes in body weight or cardiometabolic risk factors per year associated with 50-g increment in fruits. HbA<sub>1c</sub>, glycosylated hemoglobin A<sub>1c</sub>; HDL-cholesterol, high-density lipoprotein cholesterol; HOMA-IR, homeostatic model assessment of insulin resistance.

## Supplementary Materials

Adherence to A Plant-based Diet and Consumption of Specific Plant Foods - Associations with 3-year Weight-loss Maintenance and Cardiometabolic Risk Factors: A Secondary Analysis of the PREVIEW Intervention Study

**Table S7.** Longitudinal associations of vegetable intake with yearly weight regain and changes in cardiometabolic risk factors during weight-loss maintenance ( $n=710$ )

| Characteristic                                                      | Model 1 <sup>1</sup>                    |                 | Model 2 <sup>2</sup>       |                 | Model 3 <sup>3</sup>       |                 |
|---------------------------------------------------------------------|-----------------------------------------|-----------------|----------------------------|-----------------|----------------------------|-----------------|
|                                                                     | Yearly mean change (95%CI) <sup>4</sup> | <i>P</i> -value | Yearly mean change (95%CI) | <i>P</i> -value | Yearly mean change (95%CI) | <i>P</i> -value |
| ΔBody weight (kg·year <sup>-1</sup> )                               | 0.04 (-0.08, 0.16)                      | 0.531           | -0.09 (-0.24, 0.06)        | 0.227           | -                          | -               |
| ΔFat mass (kg·year <sup>-1</sup> )                                  | -0.05 (-0.18, 0.08)                     | 0.480           | -0.06 (-0.22, 0.10)        | 0.432           | -                          | -               |
| ΔWaist circumference (cm·year <sup>-1</sup> )                       | 0.01 (-0.13, 0.15)                      | 0.860           | -0.11 (-0.29, 0.06)        | 0.210           | -                          | -               |
| ΔFasting plasma glucose (mmol·L <sup>-1</sup> ·year <sup>-1</sup> ) | 0.006 (-0.009, 0.02)                    | 0.408           | 0.003 (-0.03, 0.03)        | 0.767           | 0.009 (-0.01, 0.03)        | 0.374           |
| ΔHbA <sub>1c</sub> (mmol·mol <sup>-1</sup> ·year <sup>-1</sup> )    | 0.03 (-0.02, 0.08)                      | 0.258           | 0.01 (-0.06, 0.08)         | 0.690           | 0.03 (-0.03, 0.09)         | 0.336           |
| ΔFasting insulin (mU·L <sup>-1</sup> ·year <sup>-1</sup> )          | 0.02 (-0.09, 0.12)                      | 0.733           | 0.01 (-0.12, 0.14)         | 0.880           | 0.05 (-0.07, 0.18)         | 0.408           |
| ΔHOMA-IR (year <sup>-1</sup> )                                      | 0.005 (-0.03, 0.04)                     | 0.777           | 0.001 (-0.04, 0.04)        | 0.958           | 0.02 (-0.02, 0.06)         | 0.308           |
| ΔSystolic blood pressure (mmHg·year <sup>-1</sup> )                 | -0.08 (-0.40, 0.23)                     | 0.602           | -0.13 (-0.59, 0.32)        | 0.567           | -0.37 (-1.23, 0.50)        | 0.406           |
| ΔTotal cholesterol (mmol·L <sup>-1</sup> ·year <sup>-1</sup> )      | 0.01 (-0.004, 0.03)                     | 0.133           | 0.008 (-0.01, 0.03)        | 0.439           | 0.01 (-0.01, 0.03)         | 0.369           |
| ΔLDL-cholesterol (mmol·L <sup>-1</sup> ·year <sup>-1</sup> )        | 0.01 (-0.005, 0.02)                     | 0.186           | 0.006 (-0.01, 0.02)        | 0.541           | 0.007 (-0.01, 0.03)        | 0.494           |

Analyses were performed using a linear mixed model with repeated measures.<sup>1</sup>Model 1 was adjusted for fixed factors including age, sex, ethnicity, BMI at 8 weeks, body weight or cardiometabolic risk factors at 8 weeks, and time and random factors including study center and participant-ID. <sup>2</sup>Model 2 was adjusted for confounders in model 1 plus fixed factors including time-varying physical activity, energy intake (kJ·day<sup>-1</sup>), alcohol intake (g·day<sup>-1</sup>), animal-based food intake (g·day<sup>-1</sup>), and other plant food intake (g·day<sup>-1</sup>); for systolic blood pressure, model 2 was additionally adjusted for dietary sodium intake (g·day<sup>-1</sup>). <sup>3</sup>Model 3 was adjusted confounders in model 2 plus time-varying yearly changes in body weight as a fixed factor. <sup>4</sup>Yearly mean change and 95% CI of main effects indicating changes in body weight or cardiometabolic risk factors per year associated with 100-g increment in vegetables. HbA<sub>1c</sub>, glycosylated hemoglobin A<sub>1c</sub>; HOMA-IR, homeostatic model assessment of insulin resistance; LDL-cholesterol, low-density lipoprotein cholesterol.



## Supplementary Materials

Adherence to A Plant-based Diet and Consumption of Specific Plant Foods - Associations with 3-year Weight-loss Maintenance and Cardiometabolic Risk Factors: A Secondary Analysis of the PREVIEW Intervention Study

**Table S8.** Longitudinal associations of vegetable and fruit intake with yearly weight regain and changes in cardiometabolic risk factors during weight-loss maintenance ( $n=710$ )

| Characteristic                                                      | Model 1 <sup>1</sup>                    |         | Model 2 <sup>2</sup>       |         | Model 3 <sup>3</sup>       |         |
|---------------------------------------------------------------------|-----------------------------------------|---------|----------------------------|---------|----------------------------|---------|
|                                                                     | Yearly mean change (95%CI) <sup>4</sup> | P-value | Yearly mean change (95%CI) | P-value | Yearly mean change (95%CI) | P-value |
| ΔBody weight (kg·year <sup>-1</sup> )                               | 0.01 (-0.11, 0.13)                      | 0.857   | -0.10 (-0.25, 0.05)        | 0.184   | -                          | -       |
| ΔFat mass (kg·year <sup>-1</sup> )                                  | 0.05 (-0.09, 0.18)                      | 0.485   | -0.06 (-0.22, 0.10)        | 0.467   | -                          | -       |
| ΔWaist circumference (cm·year <sup>-1</sup> )                       | -0.04 (-0.18, 0.09)                     | 0.558   | -0.13 (-0.31, 0.05)        | 0.163   | -                          | -       |
| ΔFasting plasma glucose (mmol·L <sup>-1</sup> ·year <sup>-1</sup> ) | -0.002 (-0.02, 0.01)                    | 0.735   | -0.008 (-0.03, 0.01)       | 0.479   | -0.0002 (-0.02, 0.02)      | 0.988   |
| ΔHbA <sub>1c</sub> (mmol·mol <sup>-1</sup> ·year <sup>-1</sup> )    | 0.004 (-0.05, 0.05)                     | 0.881   | -0.02 (-0.09, 0.05)        | 0.592   | 0.006 (-0.06, 0.07)        | 0.850   |
| ΔFasting insulin (mU·L <sup>-1</sup> ·year <sup>-1</sup> )          | -0.001 (-0.10, 0.10)                    | 0.979   | -0.02 (-0.16, 0.11)        | 0.727   | 0.03 (-0.09, 0.16)         | 0.601   |
| ΔHOMA-IR (year <sup>-1</sup> )                                      | -0.005 (-0.04, 0.03)                    | 0.781   | -0.02 (-0.06, 0.03)        | 0.421   | 0.008 (-0.03, 0.05)        | 0.701   |
| ΔTriacylglycerol (mmol·L <sup>-1</sup> ·year <sup>-1</sup> )        | -0.01 (-0.03, -0.002)                   | 0.021   | -0.01 (-0.03, 0.005)       | 0.167   | -0.007 (-0.02, 0.009)      | 0.399   |
| ΔTotal cholesterol (mmol·L <sup>-1</sup> ·year <sup>-1</sup> )      | -0.0001 (-0.02, 0.02)                   | 0.990   | -0.01 (-0.04, 0.008)       | 0.217   | -0.01 (-0.03, 0.01)        | 0.292   |
| ΔLDL-cholesterol (mmol·L <sup>-1</sup> ·year <sup>-1</sup> )        | -0.00001 (-0.01, 0.01)                  | 0.999   | -0.02 (-0.03, 0.003)       | 0.108   | -0.01 (-0.03, 0.004)       | 0.132   |

Analyses were performed using a linear mixed model with repeated measures.<sup>1</sup>Model 1 was adjusted for fixed factors including age, sex, ethnicity, BMI at 8 weeks, body weight or cardiometabolic risk factors at 8 weeks, and time and random factors including study center and participant-ID.<sup>2</sup>Model 2 was adjusted for confounders in model 1 plus fixed factors including time-varying physical activity, energy intake (kJ·day<sup>-1</sup>), alcohol intake (g·day<sup>-1</sup>), animal-based food intake (g·day<sup>-1</sup>), and other plant food intake (g·day<sup>-1</sup>); for systolic blood pressure and diastolic blood pressure, model 2 was additionally adjusted for dietary sodium intake (g·day<sup>-1</sup>).<sup>3</sup>Model 3 was adjusted confounders in model 2 plus time-varying yearly changes in body weight as a fixed factor.<sup>4</sup>Yearly mean change and 95% CI of main effects indicating changes in body weight or cardiometabolic risk factors per year associated with 150-g increment in combined consumption of vegetables and fruits. HbA<sub>1c</sub>, glycosylated hemoglobin A<sub>1c</sub>; HOMA-IR, homeostatic model assessment of insulin resistance; LDL-cholesterol, low-density lipoprotein cholesterol.

## Supplementary Materials

Adherence to A Plant-based Diet and Consumption of Specific Plant Foods - Associations with 3-year Weight-loss Maintenance and Cardiometabolic Risk Factors: A Secondary Analysis of the PREVIEW Intervention Study

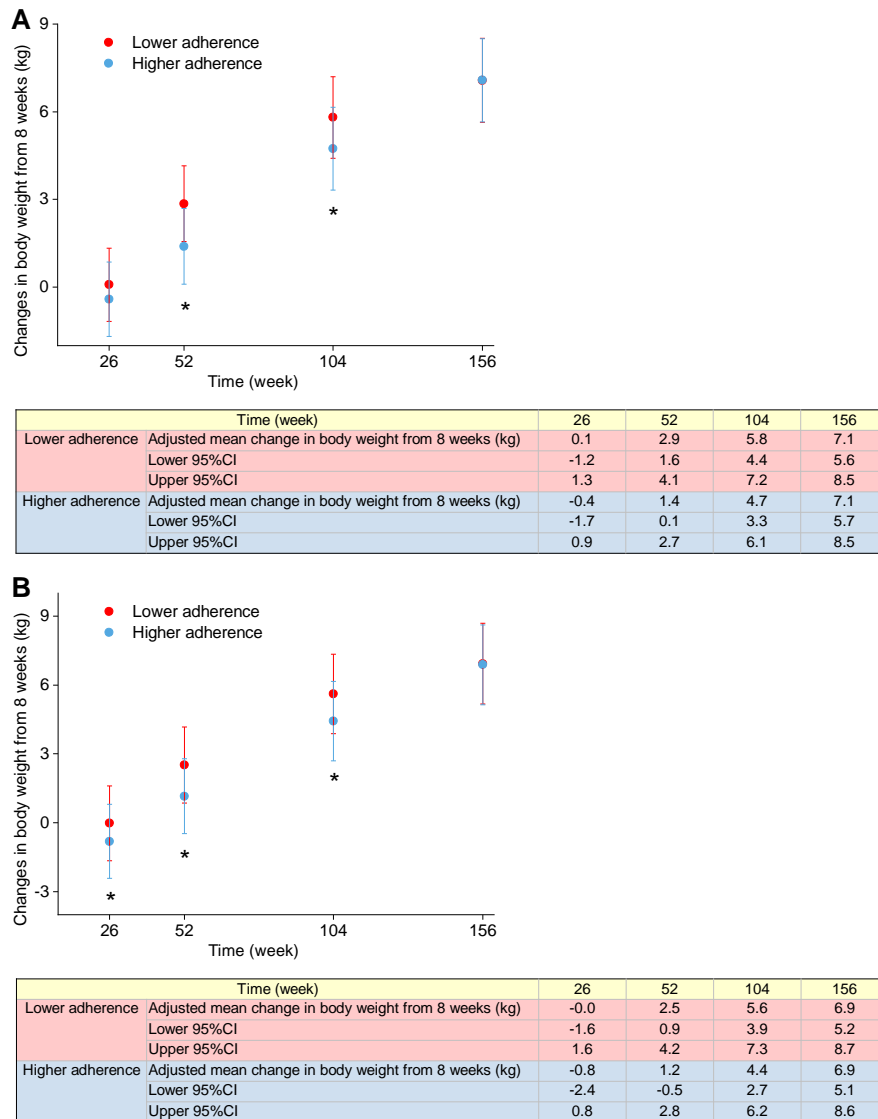

**Figure S1.** Changes in body weight during weight-loss maintenance in all participants (n=688) (A) or completers (n=493) (B) with lower or higher adherence to the plant-based diet. The two groups were defined afresh according to the plant-based diet index at each time points. Values in the figure are adjusted means and 95% CI in changes in body weight. Analyses were performed using a linear mixed model with repeated measures, adjusted for age, sex, ethnicity, values of outcomes at 8 weeks, BMI at 8 weeks, time, physical activity, alcohol intake ( $\text{g} \cdot \text{day}^{-1}$ ), energy intake ( $\text{kJ} \cdot \text{day}^{-1}$ ) as fixed effects and participant-ID and study center as random effects. As the two groups were defined afresh at each time point, the two groups were compared at each time point, regardless of the significance of time and group interaction. \* $P < 0.05$ .
